# Supplementary material
Source: publisher figshare collection journal article supplement (https://sage.figshare.com/ndownloader/files/15679394)
Supplement: Supplementary file 1 [file 15679394]

**Online Appendix**

Table 6: Summary of Negative Binomial Regression Results (Losers and Winners Only)

|  | Offline high intensity activism | Online activism | Offline low intensity activism |
| --- | --- | --- | --- |
| Gender (male) | 0.04 (0.12) | 0.05 (0.10) | 0.09 (0.07) |
| Age | -0.01 (0.00) | -0.01 (0.00)* | 0.01 (0.00)* |
| Length of party membership | 0.00 (0.00) | -0.00 (0.00) | 0.00 (0.00) |
| Nomination result (winner) | 0.35 (0.13)** | 0.12 (0.11) | 0.03 (0.08) |
| Prior party activism | 0.08 (0.01)** | 0.02 (0.01)* | 0.01 (0.00)** |
| Liberal | 0.25 (0.13) | 0.12 (0.11) | 0.04 (0.08) |
| New Democrat | 0.56 (0.17)** | 0.35 (0.15)* | 0.38 (0.10)** |
| Pseudo *R*2 | 0.057 | 0.017 | 0.024 |

Standard errors in parentheses; * p<0.05, ** p<0.01; Conservative Party is the reference category.
